# Supplementary material for: Chlorine Radical-Initiated Atmospheric Oxidation of Imines: Implications for Structural Influence on the Nitrosamine Formation
Source: Copernicus journal article supplement (doi:10.5194/egusphere-2025-4896), 2025-10-22
Supplement: Supplementary file [file egusphere-2025-4896-AC1-supplement.pdf]

## Reviewer 2

### **General comment**

*Xu et al. systematically studied the reaction mechanisms and kinetics of the  $\cdot\text{Cl}$  + imines reactions using computational methods. The authors found that imine-derived N-centered radicals exhibits various fates under tropospheric conditions, which significantly differs from the behavior of previously reported amines. This is an interesting study and the paper is a nice addition to the literature on the oxidation of organic nitrogen compounds. I believe this paper is fitting well in ACP. I can recommend publication after the following comments have been addressed.*

**Response:** We highly appreciate your insightful and helpful comments on our manuscript. We have revised the manuscript to enhance its quality.

### **Special Suggestions and Comments**

(1) *I'm confused why two different kinetic simulation software programs are used for the initial and subsequent reactions*

**Response:** Thanks for the comment. In fact, all the reaction rate constants were calculated using MultiWell 2014.1 software. In the revised manuscript, the sentences have change to:

MultiWell 2014.1 software was employed to simulate the reaction kinetics (Barker et al., 2014; Barker, 2001).

(Please see Lines 125-126)

(2) *Not clear to this reviewer which reaction steps were simulated using MultiWell program, and which were simulated using the MESMER program.*

**Response:** We appreciated the comment and agree that the statement is not clear here. As discussed in the response on the comment (1), we have rewritten the sentence. Please see Lines 125-126.

(3) *I am missing labels (A)~(E) in the Table 1.*

**Response:** Thanks. We have corrected it. (Please see Table 1)

(4) *The branch ratio in Table 1 does not appear to be 1.*

**Response:** Thanks. We have corrected it. (Please see Table 1)

(5) *The overall reaction rate constants in the abstract are reported with a unit factor of  $\times 10^{-11} \text{ cm}^3 \text{ molecule}^{-1} \text{ s}^{-1}$ , while the same constants in Table 1 use a factor of  $\times 10^{-10} \text{ cm}^3 \text{ molecule}^{-1} \text{ s}^{-1}$ . Please ensure consistency throughout the manuscript.*

**Response:** Thanks. We have corrected it. (Please see Table 1)

(6) *Missing reference for Molclus program.*

**Response:** Thanks. We have corrected it. (Please see Line 98 and reference Lu, 2025)

(7) The parameters used in the long-range transition-state theory were not shown in the manuscript.

**Response:** As discussed in the response on the Reviewer 1 comment (5), we added the parameters used in the LRTST to Table S1 in the revised SI.

(8) I suggest some important results can be moved from SI to the main text, for example, Figure S3 and S4.

**Response:** Thanks for the comment and suggestion! We have combined Figures S3 and S4 into Figure 1 and included it in the revised manuscript.

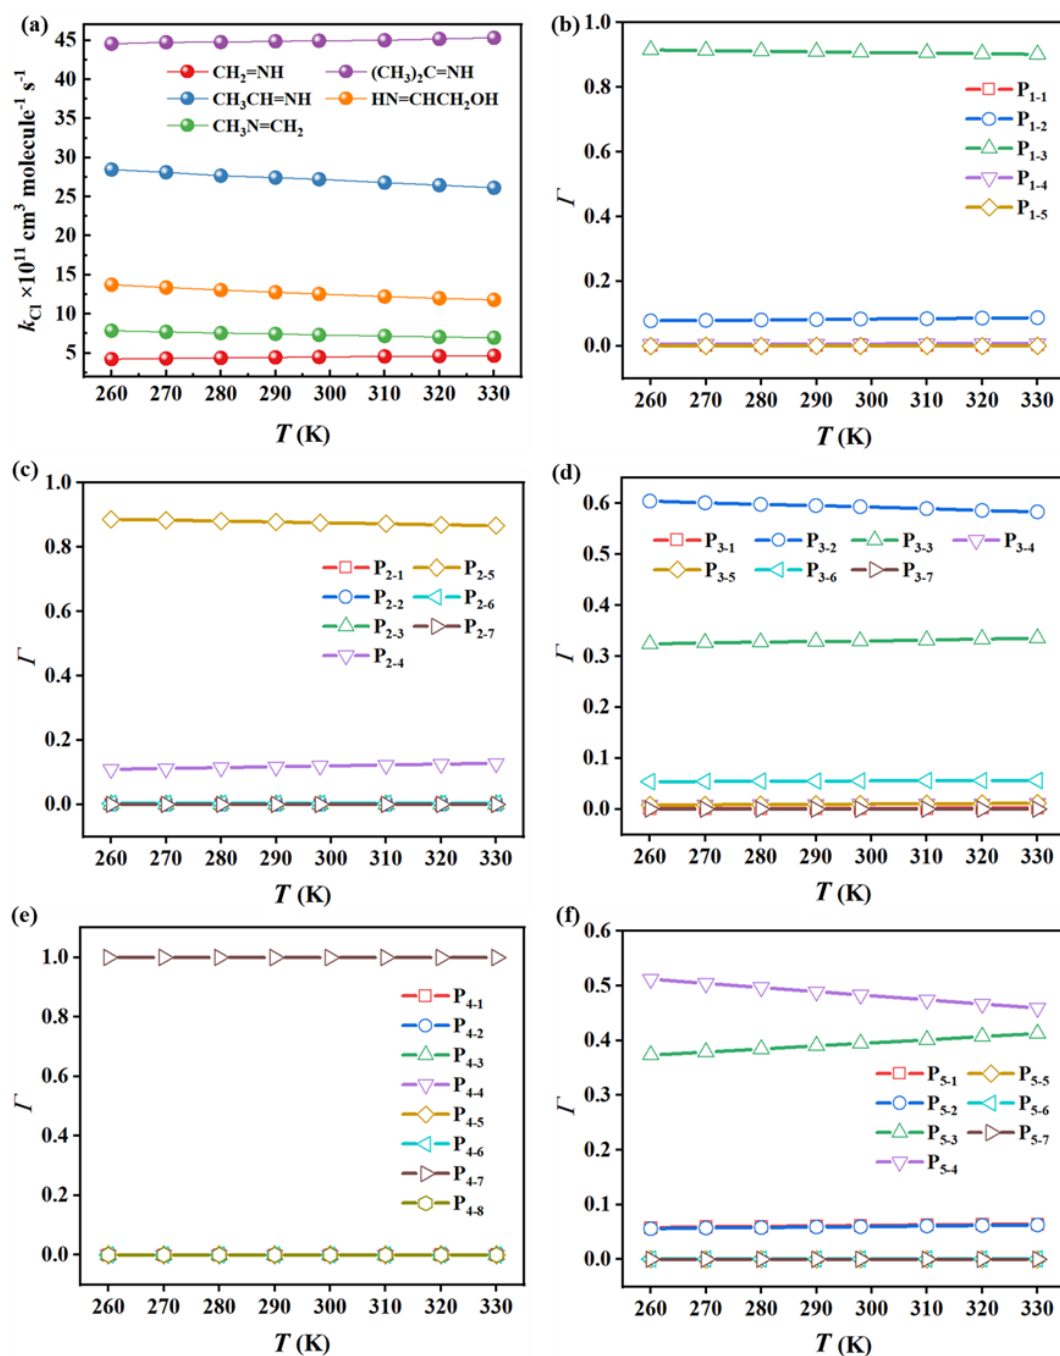

**Figure 1.** Reaction rate constants ( $k_{CI}$ ) for the reactions of five imines (a) and branching ratios ( $\Gamma$ ) for the species involved in the reactions of (b)  $\text{CH}_2=\text{NH}$ , (c)  $\text{CH}_3\text{CH}=\text{NH}$ , (d)

$\text{CH}_3\text{N}=\text{CH}_2$ , (e)  $(\text{CH}_3)_2\text{C}=\text{NH}$ , and (f)  $\text{HN}=\text{CHCH}_2\text{OH}$  initiated by  $\cdot\text{Cl}$  in the temperature range of 260 - 300 K and 1 atm.
